# Supplementary material
Source: Springer Nature journal article supplement (https://www.springermedizin.de/resource/supplementary/12933_2011_461_MOESM3_ESM.pdf/9538530)

A. Mean age at event of amputation in nondiabetic and diabetic patients.

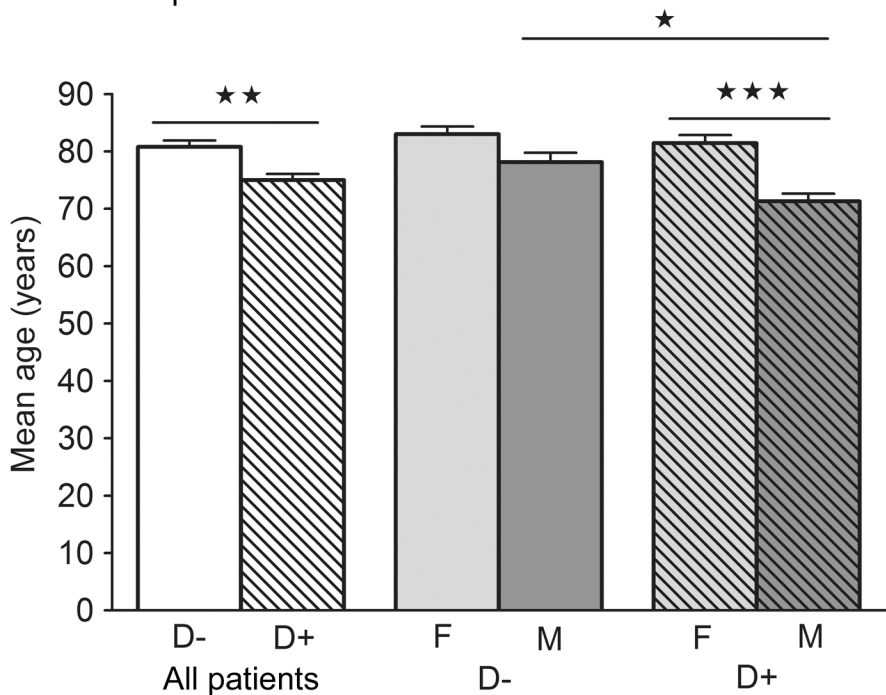

B. Mean age at event of amputation in diabetic patients.

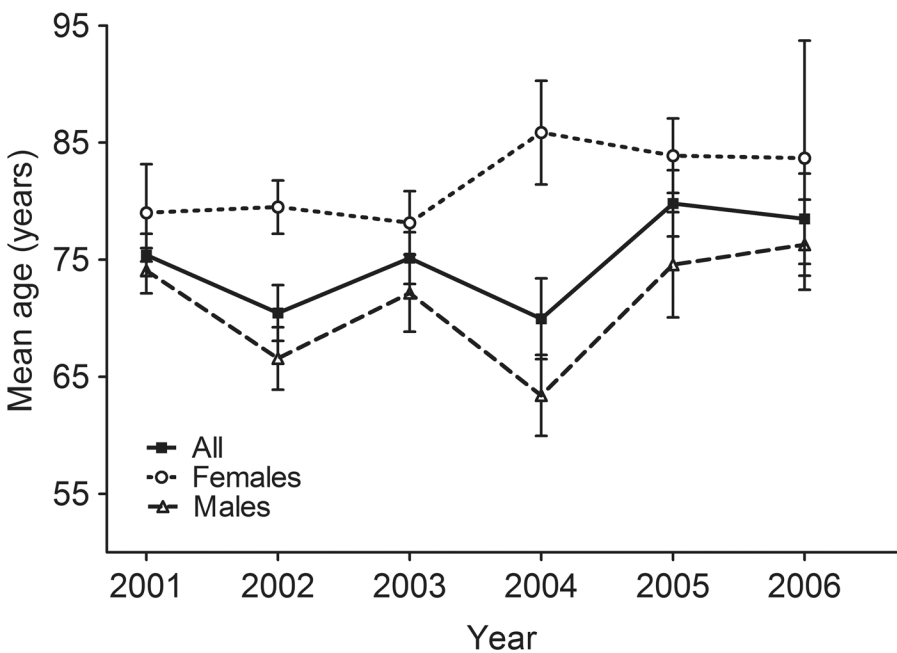

Supplement: MOESM3 [file 9538530]
